# Supplementary material
Source: PubMed Central journal article supplement (PMC5377496)
Supplement: AEM.03115-16_zam999117769s1.pdf [file AEM.03115-16_zam999117769s1.pdf]

## Supplemental Text

### Relationship Between Growth Rates and Fixation Times

The relationship between fixation of a mutated strain is related to the difference in starting and mutated growth rates. Fixation is defined to be when the mutated strain represents 95% of the total cell count. However, the percentage used does not affect the relationship.

$\mu_1 =$  growth rate of starting strain

$\mu_2 =$  growth rate of mutated strain

$C_1 =$  initial cell count of starting strain

$C_2 =$  initial cell count of mutated strain

$t_{fix} =$  time to fixation

$$0.95 = \frac{C_2 e^{\mu_2 t_{fix}}}{C_1 e^{\mu_1 t_{fix}}}$$

$$C_2 = 1$$

$$0.95 C_1 = \frac{e^{\mu_2 t_{fix}}}{e^{\mu_1 t_{fix}}}$$

$$0.95 C_1 = e^{(\mu_2 - \mu_1) t_{fix}}$$

$$\ln(0.95 C_1) = (\mu_2 - \mu_1) t_{fix}$$

$$\frac{\ln(0.95 C_1)}{\mu_2 - \mu_1} = t_{fix}$$

There the fixation time is inversely related to the difference in growth rates.

## **Supplementary Data Files**

Supplementary Data File 1 – Fitness Data from ALE experiment

**Table S1****Adaptive Evolution Summary**

| <b>Experiment #</b> | <b>Batches</b> | <b>Doublings per batch</b> | <b>Cumulative Cell Divisions</b> |
|---------------------|----------------|----------------------------|----------------------------------|
| 1                   | 208            | 2.3                        | 6.35E+12                         |
| 2                   | 182            | 2.3                        | 5.64E+12                         |
| 3                   | 176            | 2.3                        | 3.76E+12                         |
| 4                   | 195            | 2.3                        | 5.58E+12                         |
| 5                   | 216            | 2.3                        | 6.57E+12                         |
| 6                   | 187            | 2.3                        | 5.67E+12                         |
| 7                   | 106            | 4.6                        | 3.54E+12                         |
| 8                   | 104            | 4.6                        | 3.37E+12                         |
| 9                   | 105            | 4.6                        | 3.53E+12                         |
| 10                  | 106            | 4.6                        | 3.53E+12                         |
| 11                  | 109            | 4.6                        | 3.60E+12                         |
| 12                  | 114            | 4.6                        | 3.81E+12                         |
| 13                  | 69             | 6.9                        | 2.36E+12                         |
| 14                  | 68             | 6.9                        | 2.36E+12                         |
| 15                  | 71             | 6.9                        | 2.28E+12                         |
| 16                  | 70             | 6.9                        | 2.42E+12                         |
| 17                  | 70             | 6.9                        | 2.43E+12                         |
| 18                  | 70             | 6.9                        | 2.42E+12                         |
| 19                  | 34             | 9.2                        | 1.30E+12                         |
| 20                  | 33             | 9.2                        | 1.15E+12                         |
| 21                  | 39             | 9.2                        | 1.38E+12                         |
| 22                  | 44             | 9.2                        | 1.38E+12                         |
| 23                  | 41             | 9.2                        | 1.69E+12                         |
| 24                  | 42             | 9.2                        | 1.49E+12                         |
| 25                  | 36             | 11.5                       | 1.29E+12                         |
| 26                  | 25             | 11.5                       | 8.98E+11                         |
| 27                  | 34             | 11.5                       | 1.31E+12                         |
| 28                  | 34             | 11.5                       | 1.24E+12                         |
| 29                  | 31             | 11.5                       | 1.31E+12                         |
| 30                  | 33             | 11.5                       | 1.17E+12                         |

**Figure S1**

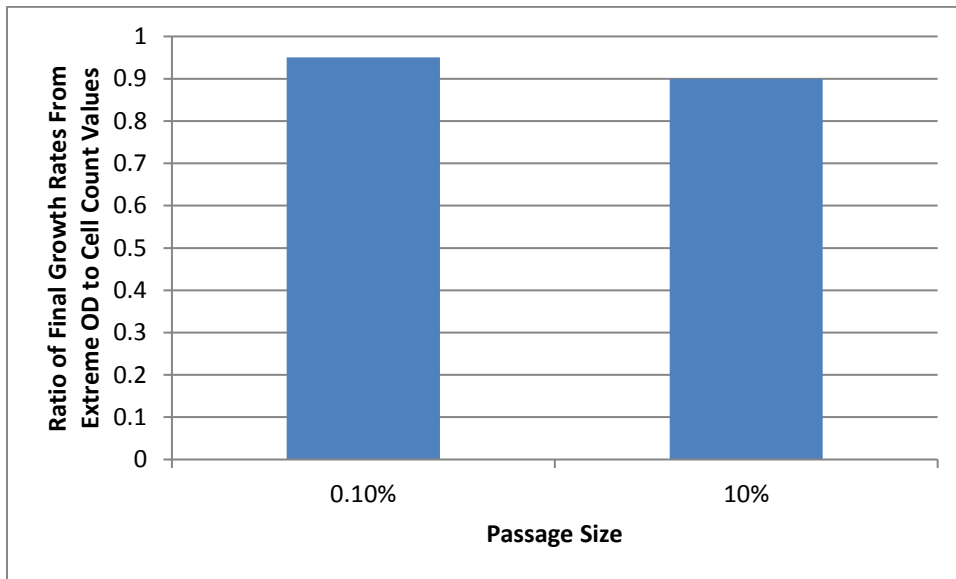

**Sensitivity analysis of dry weight per cell values** – Using extreme values of OD to cell count, identical simulations were run. The difference in final growth rates observed was never more than 10% off of the original value.

## ALEsim Source Code

\*\*\*\*\*

\* ALEsim\ALE2.m \*

\*\*\*\*\*

```
classdef ALE2 < handle
```

```
    properties
```

```
        flasks
```

```
        maxTime
```

```
        Volume
```

```
        inocVolume
```

```
        OD
```

```
        num_flasks
```

```
        od
```

```
        inoc_volume
```

```
        volume
```

```
        inoc_cells
```

```
        growth_rate
```

```
        props
```

```
        time
```

```
        max_growth
```

```
        time_stop
```

```
        folder_path
```

```
    end
```

```
    properties (Hidden)
```

end

methods

```
function obj = ALE2(Volume, inocVolume, OD, inocCells,  
growthRate, props, time, maxGrowth, samples, sDev, varargin)
```

```
if ~isempty(varargin)
    title = varargin{1};
else
    title = 'ALE_sim';
end
```

```
if samples > 1
    growthRate(samples) = 0;
    inocCells(samples) = 0;
    for i = 2:1:samples
        growthRate(i) = growthRate(1) +
sDev*sqrt(12*10)*((rand+rand+rand+rand+rand+rand+rand+rand+rand+rand)/
10-.5);
```

```

        inocCells(i) = inocCells(1)*rand/100;

        props{i} = props{1};
    end
end

obj.maxTime = time;
obj.volume = Volume;
obj.inoc_volume = inocVolume;
obj.od = OD;
obj.inoc_cells = inocCells;
obj.growth_rate = growthRate;
obj.props = props;
obj.time = time;
obj.max_growth = maxGrowth;

obj.num_flasks = max([length(obj.volume)
length(obj.inoc_volume) length(obj.od)]);

if obj.num_flasks ==1
    if obj.time <= 0
        error('Time must be greater than 0.')
    end

    obj.time_stop = true;

```



```

        t = log(obj.volume/obj.inoc_volume)/obj.max_growth;
        obj.num_flasks = round(1.1*(obj.time/t+1));
    else
        obj.time_stop = false;
    end

    if length(obj.volume) == 1
        obj.volume = repmat(obj.volume,1,obj.num_flasks);
    end

    if length(obj.inoc_volume) == 1
        obj.inoc_volume =
repmat(obj.inoc_volume,1,obj.num_flasks);
    end

    if length(obj.od) == 1
        obj.od = repmat(obj.od,1,obj.num_flasks);
    end

    if length(obj.volume) ~= obj.num_flasks
        error('obj.volume array size does not match number of
flasks')
    end

    if length(obj.inoc_volume) ~= obj.num_flasks
        error('obj.inoc_volume array size does not match
number of flasks')
    end
end

```

```
if length(obj.od) ~= obj.num_flasks
    error('obj.od array size does not match number of
flasks')
end

if obj.volume(1) < 0
    vol = ALE_Volume(1, obj.volume, obj.inoc_volume,
obj.od, obj.inoc_cells, obj.growth_rate, obj.props, obj.time);
else
    vol = obj.volume(1);
end

if obj.inoc_volume(1) < 0
    iVol = ALE_obj.inoc_volume(1, obj.volume,
obj.inoc_volume, obj.od, obj.inoc_cells, obj.growth_rate, obj.props,
obj.time);
else
    iVol = obj.inoc_volume(1);
end

if obj.od(1) < 0
    od = ALE_OD(1, obj.volume, obj.inoc_volume, obj.od,
obj.inoc_cells, obj.growth_rate, obj.props, obj.time);
else
    od = obj.od(1);
end
```

```
        obj.flasks{1} = flask(vol, iVol, obj.inoc_cells,  
obj.growth_rate, obj.props, obj.max_growth, od);
```

```
    obj.run()
```

```
end
```

```
function run(obj)
```

```
    i = 2;
```

```
    while i <= obj.num_flasks
```

```
        if i > length(obj.volume)
```

```
            obj.volume(i) = obj.volume(i-1);
```

```
        end
```

```
        if obj.volume(i) < 0
```

```
            vol = ALE_Volume(i, obj.volume, obj.inoc_volume,  
obj.od, obj.inoc_cells, obj.growth_rate, obj.props, obj.time);
```

```
        else
```

```
            vol = obj.volume(i);
```

```
        end
```

```
if i > length(obj.inoc_volume)
    obj.inoc_volume(i) = obj.inoc_volume(i-1);
end

if obj.inoc_volume(i) < 0
    iVol = ALE_obj.inoc_volume(i, obj.volume,
obj.inoc_volume, obj.od, obj.inoc_cells, obj.growth_rate, obj.props,
obj.time);
else
    iVol = obj.inoc_volume(i);
end

if i > length(obj.od)
    obj.od(i) = obj.od(i-1);
end

if obj.od(i) < 0
    od = ALE_OD(i, obj.volume, obj.inoc_volume,
obj.od, obj.inoc_cells, obj.growth_rate, obj.props, obj.time);
else
    od = obj.od(i);
end

arr = inoculum(obj.flasks{i-1}, iVol);
```

```
        obj.flasks{i} = flask(vol, iVol, arr{1}, arr{2},  
arr{3}, obj.max_growth, od);
```

```
        i=i+1;
```

```
        if obj.time_stop
```

```
            if totalTime(obj) < obj.time
```

```
                obj.num_flasks = i+1;
```

```
            else
```

```
                obj.num_flasks = i-1;
```

```
            end
```

```
        end
```

```
    end
```

```
end
```

```
function time = totalTime(obj)
```

```
    time = 0;
```

```
    flask = obj.flasks;
```

```
        for i = 1:1:length(flask)
            time = time + flask{i}.FinalTime;
        end
    end
end
end
end
```

```
*****
```

```
* ALEsim\apparentGrowth.m *
```

```
*****
```

```
function apparentGrowth(evos, index)
```

```
    A = evos{index};
```

```
    flaskNum = 1:1:length(A.flasks);
```

```
    growth = flaskNum;
```

```
    for i = 1:1:length(flaskNum)
```

```
        growth(i) = A.flasks{i}.apparentGrowth;
```

```
    end
```

```
figure
```

```
plot(flaskNum,growth, '.')
```

```
title('Apparent Growth rate per Flask')
```

```
xlabel('Flask Number')
```

```
ylabel('Apparent Growth Rate (1/hr)')
```

```
end
```

```
*****
```

```
* ALEsim\avgGrowth.m *
```

```
*****
```

```
function varargout = avgGrowth(evos)
```

```
    maxFlaskNum = 0;
```

```
    maxTime = 0;
```

```
    for i=1:length(evos)
```

```
        if length(evos{i}.flasks) > maxFlaskNum
```

```
            maxFlaskNum = length(evos{i}.flasks);
```

```
        end
```

```
        if totalTime(evos{i}) > maxTime
```

```
            maxTime = totalTime(evos{i});
```

```
        end
```

```
    end
```

```
    t = 0:maxTime/100:maxTime;
```

```
    avgG = zeros(1, length(t));
```

```

for i=1:1:length(t)

    avgTemp = zeros(1, length(evos));

    for ii=1:1:length(evos)

        try

            avgTemp(ii) = growthAtTime(evos{ii}, t(i));

        catch

        end

    end

end

for n=length(avgTemp):-1:1

    if avgTemp(n) <= 0

        avgTemp(n) = [];

    end

end

avgG(i) = mean(avgTemp);

str = [num2str(i-1) '% Completed'];

fprintf(str);

end

varargout{1} = t;

varargout{2} = avgG;

```



```
plot(t,avgG)
title('Average Growth Rate per time')
xlabel('Time (hr)')
ylabel('growthRate (1/hr)')
```

```
end
```

```
function growth = growthAtTime(evo, t)
```

```
tot = 0;
i=1;
loop = true;
while loop && i < length(evo.flasks)
    tot = tot + evo.flasks{i}.FinalTime;
    if t < tot
        growth = evo.flasks{i}.apparentGrowth;
        loop = false;
    end
    i=i+1;
```

```

end

if t >= tot
    growth = -1;
end

end

*****
* ALEsim\avgGrowthCCD.m *
*****

function varargout = avgGrowthCCD(evos)

maxFlaskNum = 0;
maxCCD = 0;
for i=1:1:length(evos)
    if length(evos{i}.flasks) > maxFlaskNum
        maxFlaskNum = length(evos{i}.flasks);
    end

    if totalTime(evos{i}) > maxCCD
        maxCCD = totalCCD(evos{i});
    end
end
end

```

```

CCD = 0:maxCCD/100:maxCCD;

avgG = zeros(1, length(CCD));

for i=1:1:length(CCD)

    avgTemp = zeros(1, length(evos));
    for ii=1:1:length(evos)
        try
            avgTemp(ii) = growthAtCCD(evos{ii}, CCD(i));
        catch

        end
    end
end

for n=length(avgTemp):-1:1
    if avgTemp(n) <= 0
        avgTemp(n) = [];
    end
end

avgG(i) = mean(avgTemp);

str = [num2str(i-1) '% Completed'];

```

```
        fprintf(str);
end

varargout{1} = CCD;
varargout{2} = avgG;

plot(CCD,avgG)
title('Average Growth Rate per time')
xlabel('Time (hr)')
ylabel('Cumulative Cell Divisions ( )')

end

function growth = growthAtCCD(evo, CCD)

tot = 0;
i=1;
loop = true;
while loop && i < length(evo.flasks)
```

```
        tot = tot + sum(evo.flasks{i}.FinalCells) -  
sum(evo.flasks{i}.InitCells);
```

```
    if CCD < tot
```

```
        growth = evo.flasks{i}.apparentGrowth;
```

```
        loop = false;
```

```
    end
```

```
    i=i+1;
```

```
end
```

```
if CCD >= tot
```

```
    growth = -1;
```

```
end
```

```
end
```

```
function total_CCD = totalCCD(evo)
```

```
    total_CCD = 0;
```

```
    for f = 1:1:length(evo.flasks)
```

```
        total_CCD = total_CCD + sum(evo.flasks{f}.FinalCells) -  
sum(evo.flasks{f}.InitCells);
```

```
    end
```

```
end
```

```
*****
```

```
* ALEsim\avgGrowthFlask.m *
```

```
*****
```

```

function avgGrowthFlask(evos)

minFlaskNum = length(evos{1}.flasks);
for i=1:1:length(evos)
    if length(evos{i}.flasks) < minFlaskNum
        minFlaskNum = length(evos{i}.flasks);
    end
end

flask = 1:1:minFlaskNum;

growths = zeros(length(evos), minFlaskNum);
for i=1:1:length(evos)
    for n=1:1:minFlaskNum
        growths(i,n) = evos{i}.flasks{n}.apparentGrowth;
    end
end

sDev = zeros(1,minFlaskNum);
avGrowth = sDev;
for n = 1:1:minFlaskNum
    sDev(n) = std(growths(:,n));
end

```

```
    avGrowth(n) = mean(growths(:,n));  
end
```

```
plot(flask,avGrowth,'*')  
title('Average Growth Rate per flask')  
xlabel('Flask')  
ylabel('growthRate (1/hr)')  
hold off
```

```
end
```

```
*****
```

```
* ALEsim\binopdf.m *
```

```
*****
```

```
function y = binopdf(x,n,p)
```

```
if nargin < 3,
    error('stats:binopdf:TooFewInputs','Requires three input
arguments');
end

[errorcode x n p] = distchk(3,x,n,p);

if errorcode > 0
    error('stats:binopdf:InputSizeMismatch',...
        'Requires non-scalar arguments to match in size.');
```

  

```
end

if isa(x,'single') || isa(n,'single') || isa(p,'single')
    y = zeros(size(x),'single');
else
```



```

    y = zeros(size(x));
end

if ~isfloat(x)
    x = double(x);
end

if ~isfloat(n)
    n = double(n);
end

k = find(x >= 0 & x == round(x) & x <= n);
if any(k)

    t = (p(k)==0);
    if any(t)
        kt = k(t);
        y(kt) = (x(kt)==0);
        k(t) = [];
    end

    t = (p(k)==1);
    if any(t)
        kt = k(t);
        y(kt) = (x(kt)==n(kt));
        k(t) = [];
    end

end

end

```

```

if any(k)
    nk = gammaln(n(k) + 1) - gammaln(x(k) + 1) - gammaln(n(k) - x(k) +
1);
    lny = nk + x(k).*log( p(k)) + (n(k) - x(k)).*log1p(-p(k));
    y(k) = exp(lny);
end

```

```

k1 = find(n < 0 | p < 0 | p > 1 | round(n) ~= n);

```

```

if any(k1)

```

```

    y(k1) = NaN;

```

```

end

```

```

*****

```

```

* ALEsim\cell2mutate.m *

```

```

*****

```

```

function cell = cell2mutate(cells)

```

```

    cells = cells/sum(cells);

```

```

    cell = randIndex(cells);

```

```

    if cell == 0

```

```

        error('cells array does not sum to 1')

```

```

    end

```

```

end

```

```

function index = randIndex(prob)

```

```
rNum = rand;
index = 1;

if length(prob) == 1
    index = 1;

else
    sums = cumsum(prob);
    for i=1:1:length(prob)-1
        if rNum <= sums(length(prob)-i+1)
            index = length(prob)-i+1;
        end
    end
end

end

*****
* ALEsim\distchck.m *
*****
```

```
function [errorcode,out1,out2,out3,out4] =  
distchck(npargs,arg1,arg2,arg3,arg4)
```

```
errorcode = 0;
```

```
if npargs == 1
```

```
    out1 = arg1;
```

```
    return;
```

```
end
```

```
if npargs == 2
```

```
    [r1 c1] = size(arg1);
```

```
    [r2 c2] = size(arg2);
```

```
    scalararg1 = (prod(size(arg1)) == 1);
```

```
    scalararg2 = (prod(size(arg2)) == 1);
```

```
    if ~scalararg1 & ~scalararg2
```

```
        if r1 ~= r2 | c1 ~= c2
```

```
            errorcode = 1;
```

```
            return;
```

```
        end
```

```
    end
```

```
    if scalararg1
```

```

        out1 = arg1(ones(r2,1),ones(c2,1));
    else
        out1 = arg1;
    end
    if scalararg2
        out2 = arg2(ones(r1,1),ones(c1,1));
    else
        out2 = arg2;
    end
end

end

if nparms == 3
    [r1 c1] = size(arg1);
    [r2 c2] = size(arg2);
    [r3 c3] = size(arg3);
    scalararg1 = (prod(size(arg1)) == 1);
    scalararg2 = (prod(size(arg2)) == 1);
    scalararg3 = (prod(size(arg3)) == 1);

    if ~scalararg1 & ~scalararg2
        if r1 ~= r2 | c1 ~= c2
            errorcode = 1;
            return;
        end
    end

end

if ~scalararg1 & ~scalararg3

```

```

    if r1 ~= r3 | c1 ~= c3
        errorcode = 1;
        return;
    end
end

if ~scalararg3 & ~scalararg2
    if r3 ~= r2 | c3 ~= c2
        errorcode = 1;
        return;
    end
end

if ~scalararg1
    out1 = arg1;
end

if ~scalararg2
    out2 = arg2;
end

if ~scalararg3
    out3 = arg3;
end

rows = max([r1 r2 r3]);
columns = max([c1 c2 c3]);

if scalararg1
    out1 = arg1(ones(rows,1),ones(columns,1));

```

```
end

if scalararg2
    out2 = arg2(ones(rows,1),ones(columns,1));
end

if scalararg3
    out3 = arg3(ones(rows,1),ones(columns,1));
end

out4 = [];

end

if nparms == 4
    [r1 c1] = size(arg1);
    [r2 c2] = size(arg2);
    [r3 c3] = size(arg3);
    [r4 c4] = size(arg4);

    scalararg1 = (prod(size(arg1)) == 1);
    scalararg2 = (prod(size(arg2)) == 1);
    scalararg3 = (prod(size(arg3)) == 1);
    scalararg4 = (prod(size(arg4)) == 1);

    if ~scalararg1 & ~scalararg2
        if r1 ~= r2 | c1 ~= c2
            errorcode = 1;
            return;
        end
    end

end
```

```
if ~scalararg1 & ~scalararg3
    if r1 ~= r3 | c1 ~= c3
        errorcode = 1;
        return;
    end
end
```

```
if ~scalararg1 & ~scalararg4
    if r1 ~= r4 | c1 ~= c4
        errorcode = 1;
        return;
    end
end
```

```
if ~scalararg3 & ~scalararg2
    if r3 ~= r2 | c3 ~= c2
        errorcode = 1;
        return;
    end
end
```

```
if ~scalararg4 & ~scalararg2
    if r4 ~= r2 | c4 ~= c2
        errorcode = 1;
        return;
    end
end
```



```
end
```

```
if ~scalararg3 & ~scalararg4
```

```
    if r3 ~= r4 | c3 ~= c4
```

```
        errorcode = 1;
```

```
        return;
```

```
    end
```

```
end
```

```
if ~scalararg1
```

```
    out1 = arg1;
```

```
end
```

```
if ~scalararg2
```

```
    out2 = arg2;
```

```
end
```

```
if ~scalararg3
```

```
    out3 = arg3;
```

```
end
```

```
if ~scalararg4
```

```
    out4 = arg4;
```

```
end
```

```
rows = max([r1 r2 r3 r4]);
```

```
columns = max([c1 c2 c3 c4]);
```

```
if scalararg1
```

```
    out1 = arg1(ones(rows,1),ones(columns,1));
```

```
end

if scalararg2
    out2 = arg2(ones(rows,1),ones(columns,1));
end

if scalararg3
    out3 = arg3(ones(rows,1),ones(columns,1));
end

if scalararg4
    out4 = arg4(ones(rows,1),ones(columns,1));
end

end

*****
* example_script.m *
*****

clear classes

clear java
```

Vol = 0.250;

iVol = 10e-6;

inoc = 1.8e+07;

growth = .28;

props{1} = 0;

samples = 0;

sDev = .1;

OD = 1.2;

maxGrowth = 1.0;

numEvos = 100;

```

time = 24*50;

title = 'ALEsim_example';

addpath('ALEsim')
mkdir(fullfile(pwd, title))
fprintf([datestr(now) ''])
tic
evos = {};
parfor ii=1:numEvos
    evos{ii} = ALE2(Vol, iVol, OD, inoc, growth, props, time,
maxGrowth, samples, sDev, title);
    e_temp = evos{ii};
    parsave(fullfile(fullfile(pwd, title), [title '_split_'
num2str(ii) '.mat']), e_temp)
end

fprintf([datestr(now) ''])
t = toc;
str = ['Elapsed time is ' num2str(t) ' seconds'];
fprintf(str)
str = ['Time per ALE is ' num2str(t/numEvos) ' seconds'];

```

```
fprintf(str)
```

```
save(fullfile(fullfile(pwd, title), [title datestr(now,30)
'.mat']), 'evos')
```

```
*****
```

```
* ALEsim\flask.m *
```

```
*****
```

```
classdef flask < handle
```

```
properties
```

```
Volume
```

```
InitCells
```

```
GrowthRate
```

```
CellProps
```

```
FinalCells
```

```
FinalTime
```

```
OD
```

```

mutNum

apparentGrowth

maxGrowth

end

properties (Hidden)

wInit

OD2Cells=1551724137931.03;

InitTime

cellsAtOD

end

methods

function obj = flask(Volume, InoculumVolume, Inoculum,
Growth, Props, maxGrowth, OD)

    obj.Volume = Volume+InoculumVolume;

    obj.InitCells = Inoculum;

    obj.GrowthRate = Growth;

    obj.CellProps = Props;

    obj.FinalTime = 0;

    obj.wInit = Inoculum;

    obj.mutNum = 0;

    obj.maxGrowth = maxGrowth;

    obj.OD = OD;

    obj.cellsAtOD = obj.OD2Cells*obj.Volume*obj.OD;

    Div = mutateDivisions();

```

```
mutateTime = zeroExp(obj.wInit, obj.GrowthRate,  
(sum(obj.wInit)+Div));
```

```
timeTilPassage = zeroExp(obj.wInit, obj.GrowthRate,  
obj.cellsAtOD);
```

```
while mutateTime < timeTilPassage
```

```
    obj.wInit = grow(obj.wInit, obj.GrowthRate,  
mutateTime);
```

```
    obj.FinalTime = obj.FinalTime + mutateTime;
```

```
    Cell = cell2mutate(obj.wInit);
```

```
    arr = mutateCells(obj.GrowthRate(Cell),  
obj.CellProps{Cell}, obj.maxGrowth);
```

```
    growth = arr{1};
```

```
    props = arr{2};
```

```
    obj.wInit = [obj.wInit 1];
```

```
obj.GrowthRate = [obj.GrowthRate growth];  
obj.CellProps{length(obj.GrowthRate)} = props;
```

```
Div = mutateDivisions();
```

```
mutateTime = zeroExp(obj.wInit, obj.GrowthRate,  
(sum(obj.wInit)+Div));
```

```
timeTilPassage = zeroExp(obj.wInit,  
obj.GrowthRate, obj.cellsAtOD);
```

```
end
```

```
obj.FinalCells = grow(obj.wInit, obj.GrowthRate,  
timeTilPassage);
```

```
obj.FinalTime = obj.FinalTime + timeTilPassage;
```

```
obj.mutNum = length(obj.FinalCells) -  
length(obj.InitCells);
```



```
        obj.apparentGrowth =  
log(sum(obj.FinalCells)/sum(obj.InitCells))/obj.FinalTime;
```

```
end
```

```
function arr = inoculum(obj, iVol)
```

```
totalCells = sum(obj.FinalCells/obj.Volume*iVol);
```

```
prob = obj.FinalCells/sum(obj.FinalCells);
```

```
expected = prob.*totalCells;
```

```
cells = expected;
```

```
for i=1:1:length(cells)
```

```
    cells(i) = normrnd(expected(i), sqrt(expected(i)));
```

```
end
```

```
cells = round(cells);
```

```
growth = obj.GrowthRate;
```

```
props = obj.CellProps;
```

```
    i = 1;
    while i <= length(cells)
        if cells(i) <= 0
            cells(i) = [];
            growth(i) = [];
            props(i) = [];
            i=i-1;
        end
        i=i+1;
    end
end
```

```
    arr{1} = cells;
    arr{2} = growth;
    arr{3} = props;
```

```
end
```

```
end
```

```
end
```

```
*****
```

```
* ALEsim\grow.m *
```

```
*****
```

```
function cells = grow(C, u, t)
```

```

        cells = C.*exp(u*t);
end

*****

* ALEsim\mutateCells.m *
*****

function arr = mutateCells(growth, props, maxGrowth)

    growth = growth + normrnd(0.1,0.1);

    if growth > maxGrowth
        growth = maxGrowth;
    end

    arr{1} = growth;
    arr{2} = props;
end

*****

* ALEsim\mutateDivisions.m *
*****

```

```
function div = mutateDivisions()

    prob = 10^-8.8;

    Dmax = 1/prob*12;
    D = round(1:Dmax/100:Dmax);
    pdf = binopdf(1, D, prob);

    div = randpdf(pdf, D, [1,1]);
end

*****
* ALEsim\normrnd.m *
*****

function r = normrnd(mu, sigma, m, n);
```

```
if nargin < 2,
    error('Requires at least two input arguments.');
```

end

```
if nargin == 2
    [errorcode rows columns] = rndcheck(2,2,mu,sigma);
```

end

```
if nargin == 3
    [errorcode rows columns] = rndcheck(3,2,mu,sigma,m);
```

end

```
if nargin == 4
    [errorcode rows columns] = rndcheck(4,2,mu,sigma,m,n);
```

end

```
if errorcode > 0
    error('Size information is inconsistent.');
```

end

```
r = zeros(rows, columns);
```

  

```
r = randn(rows,columns) .* sigma + mu;
```

```

if any(any(sigma <= 0));
    if prod(size(sigma) == 1)
        tmp = NaN;
        r = tmp(ones(rows,columns));
    else
        k = find(sigma <= 0);
        tmp = NaN;
        r(k) = tmp(ones(size(k)));
    end
end

function [errorcode, rows, columns] =
rndcheck(nargs,nparms, arg1,arg2,arg3,arg4,arg5)

sizeinfo = nargs - nparms;
errorcode = 0;

if nparms == 3
    [r1 c1] = size(arg1);
    [r2 c2] = size(arg2);
    [r3 c3] = size(arg3);

```

```
end
```

```
if nparms == 2
```

```
    [r1 c1] = size(arg1);
```

```
    [r2 c2] = size(arg2);
```

```
end
```

```
if sizeinfo == 0
```

```
    if nparms == 1
```

```
        [rows columns] = size(arg1);
```

```
    end
```

```
if nparms == 2
```

```
    scalararg1 = (prod(size(arg1)) == 1);
```

```
    scalararg2 = (prod(size(arg2)) == 1);
```

```
    if ~scalararg1 & ~scalararg2
```

```
        if r1 ~= r2 | c1 ~= c2
```

```
            errorcode = 1;
```

```
            return;
```

```
        end
```

```
    end
```

```
    if ~scalararg1
```

```
        [rows columns] = size(arg1);
```

```
    elseif ~scalararg2
```

```
        [rows columns] = size(arg2);
```

```
    else
```

```
        [rows columns] = size(arg1);
```

```
end

end

if nparms == 3

    scalararg1 = (prod(size(arg1)) == 1);
    scalararg2 = (prod(size(arg2)) == 1);
    scalararg3 = (prod(size(arg3)) == 1);

    if ~scalararg1 & ~scalararg2
        if r1 ~= r2 | c1 ~= c2
            errorcode = 1;
            return;
        end
    end

end

if ~scalararg1 & ~scalararg3
    if r1 ~= r3 | c1 ~= c3
        errorcode = 1;
        return;
    end
end

if ~scalararg3 & ~scalararg2
    if r3 ~= r2 | c3 ~= c2
        errorcode = 1;
        return;
    end
end
```



```

    end

    if ~scalararg1
        [rows columns] = size(arg1);
    elseif ~scalararg2
        [rows columns] = size(arg2);
    else
        [rows columns] = size(arg3);
    end

end

end

end

if sizeinfo == 1
    scalararg1 = (prod(size(arg1)) == 1);
    if nparms == 1
        if prod(size(arg2)) ~= 2
            errorcode = 2;
            return;
        end
        if ~scalararg1 & arg2 ~= size(arg1)
            errorcode = 3;
            return;
        end
        if (arg2(1) < 0 | arg2(2) < 0 | arg2(1) ~= round(arg2(1)) |
arg2(2) ~= round(arg2(2))),
            errorcode = 4;
            return;
        end
    end
end

```

```

    rows    = arg2(1);
    columns = arg2(2);
end

if nparms == 2
    if prod(size(arg3)) ~= 2
        errorcode = 2;
        return;
    end
    scalararg2 = (prod(size(arg2)) == 1);
    if ~scalararg1 & ~scalararg2
        if r1 ~= r2 | c1 ~= c2
            errorcode = 1;
            return;
        end
    end
end

if (arg3(1) < 0 | arg3(2) < 0 | arg3(1) ~= round(arg3(1)) |
arg3(2) ~= round(arg3(2))),
    errorcode = 4;
    return;
end

if ~scalararg1
    if any(arg3 ~= size(arg1))
        errorcode = 3;
        return;
    end
    [rows columns] = size(arg1);

```

```

elseif ~scalararg2
    if any(arg3 ~= size(arg2))
        errorcode = 3;
        return;
    end
    [rows columns] = size(arg2);
else
    rows = arg3(1);
    columns = arg3(2);
end
end

if nparms == 3
    if prod(size(arg4)) ~= 2
        errorcode = 2;
        return;
    end
    scalararg1 = (prod(size(arg1)) == 1);
    scalararg2 = (prod(size(arg2)) == 1);
    scalararg3 = (prod(size(arg3)) == 1);

    if (arg4(1) < 0 | arg4(2) < 0 | arg4(1) ~= round(arg4(1)) |
arg4(2) ~= round(arg4(2))),
        errorcode = 4;
        return;
    end
end

```

```
if ~scalararg1 & ~scalararg2
    if r1 ~= r2 | c1 ~= c2
        errorcode = 1;
        return;
    end
end

if ~scalararg1 & ~scalararg3
    if r1 ~= r3 | c1 ~= c3
        errorcode = 1;
        return;
    end
end

if ~scalararg3 & ~scalararg2
    if r3 ~= r2 | c3 ~= c2
        errorcode = 1;
        return;
    end
end

if ~scalararg1
    if any(arg4 ~= size(arg1))
        errorcode = 3;
        return;
    end

    [rows columns] = size(arg1);
elseif ~scalararg2
```

```

        if any(arg4 ~= size(arg2))
            errorcode = 3;
            return;
        end

        [rows columns] = size(arg2);
    elseif ~scalararg3
        if any(arg4 ~= size(arg3))
            errorcode = 3;
            return;
        end

        [rows columns] = size(arg3);
    else
        rows = arg4(1);
        columns = arg4(2);
    end
end
end

if sizeinfo == 2
    if nparms == 1
        scalararg1 = (prod(size(arg1)) == 1);
        if ~scalararg1
            [rows columns] = size(arg1);
            if rows ~= arg2 | columns ~= arg3
                errorcode = 3;
                return;
            end
        end
    end
end

```

```

    end

    if (arg2 < 0 | arg3 < 0 | arg2 ~= round(arg2) | arg3 ~=
round(arg3)),
        errorcode = 4;
        return;
    end

    rows = arg2;
    columns = arg3;

end

if nparms == 2

    scalararg1 = (prod(size(arg1)) == 1);
    scalararg2 = (prod(size(arg2)) == 1);
    if ~scalararg1 & ~scalararg2
        if r1 ~= r2 | c1 ~= c2
            errorcode = 1;
            return;
        end
    end

end

if ~scalararg1

    [rows columns] = size(arg1);
    if rows ~= arg3 | columns ~= arg4
        errorcode = 3;
        return;
    end

end

elseif ~scalararg2

    [rows columns] = size(arg2);

```

```

        if rows ~= arg3 | columns ~= arg4
            errorcode = 3;
            return;
        end
    else
        if (arg3 < 0 | arg4 < 0 | arg3 ~= round(arg3) | arg4 ~=
round(arg4)),
            errorcode = 4;
            return;
        end
        rows = arg3;
        columns = arg4;
    end
end

if nparms == 3
    scalararg1 = (prod(size(arg1)) == 1);
    scalararg2 = (prod(size(arg2)) == 1);
    scalararg3 = (prod(size(arg3)) == 1);

    if ~scalararg1 & ~scalararg2
        if r1 ~= r2 | c1 ~= c2
            errorcode = 1;
            return;
        end
    end
end

```

```
if ~scalararg1 & ~scalararg3
    if r1 ~= r3 | c1 ~= c3
        errorcode = 1;
        return;
    end
end

if ~scalararg3 & ~scalararg2
    if r3 ~= r2 | c3 ~= c2
        errorcode = 1;
        return;
    end
end

if ~scalararg1
    [rows columns] = size(arg1);
    if rows ~= arg4 | columns ~= arg5
        errorcode = 3;
        return;
    end
elseif ~scalararg2
    [rows columns] = size(arg2);
    if rows ~= arg4 | columns ~= arg5
        errorcode = 3;
        return;
    end
elseif ~scalararg3
```



```

        [rows columns] = size(arg3);
        if rows ~= arg4 | columns ~= arg5
            errorcode = 3;
            return;
        end
    else
        if (arg4 < 0 | arg5 < 0 | arg4 ~= round(arg4) | arg5 ~=
round(arg5)),
            errorcode = 4;
            return;
        end
        rows    = arg4;
        columns = arg5;
    end
end
end

end

*****
* ALEsim\parsave.m *
*****

function parsave(fname,data)

var_name=genvarname(inputname(2));
eval([var_name '=data'])

try

```

```
    save(fname,var_name,'-append')
catch
```

```
    save(fname,var_name)
```

```
end
```

```
*****
```

```
* ALEsim\randpdf.m *
```

```
*****
```

```
function x=randpdf(p,px,dim)
```



```
error(nargchk(3, 3, nargin))
```

```
px=px(:);
```

```
p=p(:)./trapz(px,p(:));
```

```
pxi=[linspace(min(px),max(px),10000)]';
```

```
pi=interp1(px,p,pxi,'linear');
```

```
cdfp = cumtrapz(pxi,pi);
```

```
ind=[true; not(diff(cdfp)==0)];
```

```
cdfp=cdfp(ind);
```

```
pi=pi(ind);
```

```
pxi=pxi(ind);
```

```
uniformDistNum=rand(dim);
```

```
userDistNum=interp1(cdfp,pxi,uniformDistNum(:),'linear');
```

```
if nargout==0
```

```
    subplot(3,4,[1 2 5 6])
```

```
    [n,xout]=hist(userDistNum,50);
```

```
    n=n./sum(n)./(xout(2)-xout(1));
```

```
    bar(xout,n)
```

```
    hold on
```

```
    plot(pxi, pi./trapz(pxi,pi),'r')
```

```
    hold off
```

```
    legend('pdf from generated numbers','input pdf')
```

```
    subplot(3,4,[3 4 7 8])
```

```
    plot(pxi, cdfp,'g')
```

```
    ylim([0 1])
```

```
    legend('cdf from input pdf')
```

```
    subplot(3,4,[9:12])
```

```
    plot(userDistNum)
```

```
    legend('generated numbers')
```

```
else
```

```
    x=reshape(userDistNum,dim);
```

```
end
```

```
*****
```

```
* ALEsim\zeroExp.m *
```

```
*****
```

```
function [guess val] = zeroExp(C, u, OD)
```

```
    guess = 20;
```

```
    while func(C, u, OD, guess) < 0
```

```
        guess = guess + 50;
```

```
    end
```

```
        err = 1000000;
```

```
        val = func(C, u, OD, guess);
```

```
        while abs(val) > err
```

```
            guess = guess - val/dfunc(C, u, guess);
```

```
            val = func(C, u, OD, guess);
```

```
        end
```

```
    end
```

```
function val = func(C, u, OD, t)
```

```
    val = (sum(C.*exp(u.*t))-OD);
```

```
end
```

```
function val = dfunc(C, u, t)
```

```
    val = sum(C.*u.*exp(u.*t));
```

**end**
